# Supplementary material for: JEWELFISH: 24-month results from an open-label study in non-treatment-naïve patients with SMA receiving treatment with risdiplam
Source: Springer Nature journal article supplement (doi:10.1007/s00415-024-12318-z), 2024-05-11

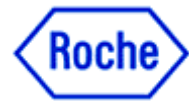

**PLEASE READ CAREFULLY:**

By opening the attached document you agree to the following terms of use:

- You may not use this document or the information contained herein to a regulatory authority in connection with an application for a marketing authorization or any other regulatory submission without the express written consent of Roche. Please contact [global.data\\_sharing@roche.com](mailto:global.data_sharing@roche.com)
- You may not use this document or the information contained herein to identify clinical trial patients.
- You may not copy, reproduce, or make this document available in any manner that would permit a third-party to review or use the document without first agreeing to these terms of use.

To open the document, please follow the instructions below:

- Please use Adobe Acrobat software to view the document.
- On the right hand panel, open the Attachments tab (paper clip) to see the document attached (see *screenshot below for an example*).

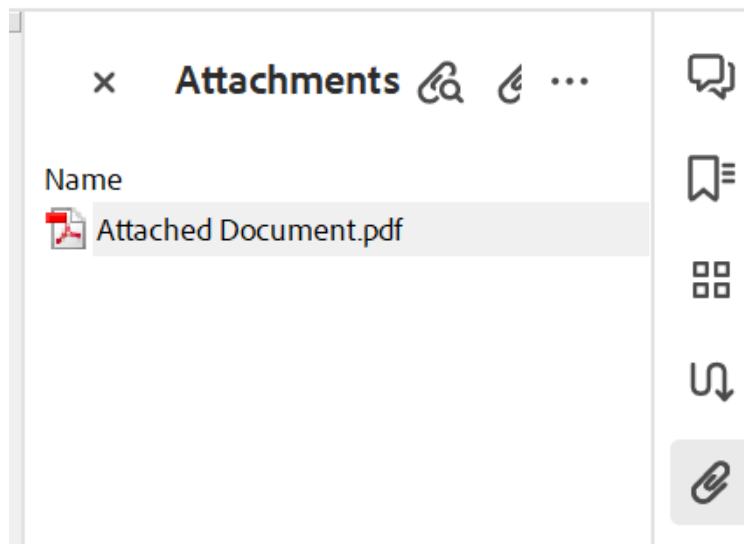

Supplement: MOESM2 [file 27078746]
